# Supplementary material for: Adsorption behavior of one-dimensional coordination polymers [Cu(bipy)X]n (X = 2Cl− and SO42−) toward acid orange 7 and methyl orange
Source: Royal Society of Chemistry journal article supplement (doi:10.1039/c5ra09830k), 2015-01-01
Supplement: c5ra09830k1.pdf [file c5ra09830k1.pdf]

## Supplementary Material

### Adsorption Behavior of One-dimensional Coordination Supramolecular Polymers $[\text{Cu}(\text{bipy})\text{X}]_n$ ( $\text{X} = 2\text{Cl}^-$ and $\text{SO}_4^{2-}$ ) Toward Acid Orange 7 and Methyl Orange

Liang Xiao<sup>a,b</sup>, Ya Xiong<sup>a,b\*</sup>, Zhanhao Wen<sup>a,b</sup>, Shuanghong Tian<sup>a,b</sup>

<sup>a</sup> School of Environmental Science and Engineering, Sun Yat-Sen (Zhongshan) University, Guangzhou, 510275, P. R. China.

<sup>b</sup> Guangdong Provincial Key Laboratory of Environmental Pollution Control and Remediation Technology, Guangzhou, 510275, P. R. China.

\* Corresponding author. Tel.: 86-20-84115556; fax: 86-20-39332690.

E-mail address: [cesxya@mail.sysu.edu.cn](mailto:cesxya@mail.sysu.edu.cn) (Y. Xiong)

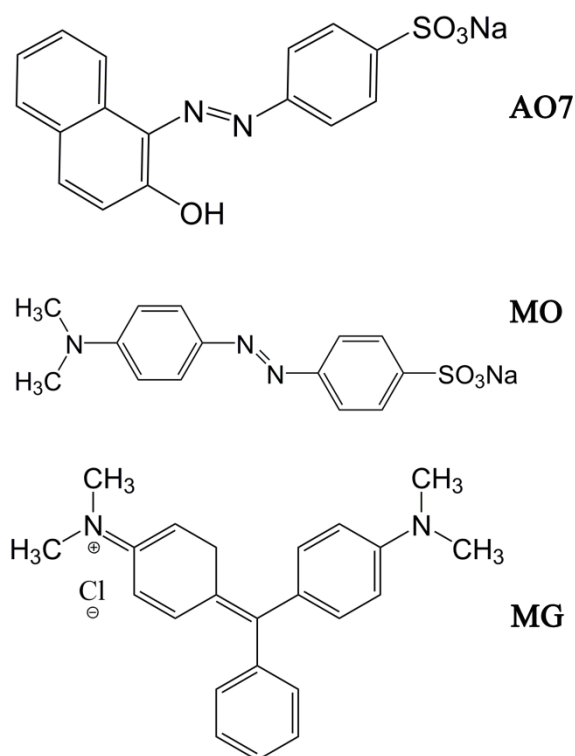

Figure S1. The molecular structures of AO7, MO and MG.

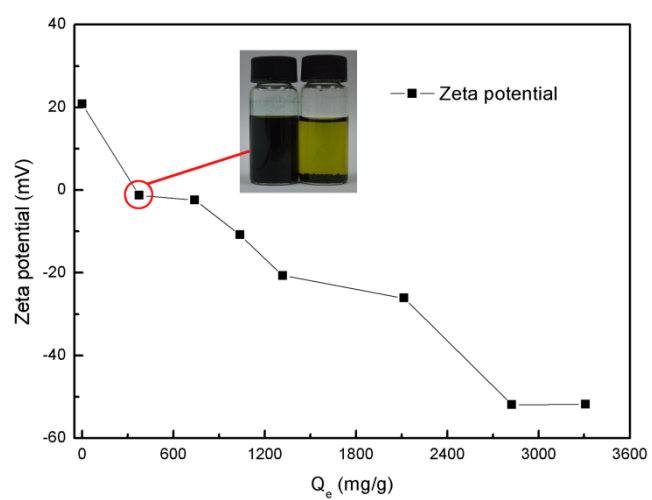

Figure S2. The zeta potential of the samples with  $[\text{Cu}(\text{bipy})(\text{SO}_4)]_n$  after adsorbed different amount of AO7. The red circle represents the zeta potential of sample in the picture without MG in it.
